# Supplementary material
Source: Springer Nature journal article supplement (https://www.springermedizin.de/resource/supplementary/13024_2014_566_MOESM7_ESM.pdf/9644418)

**A**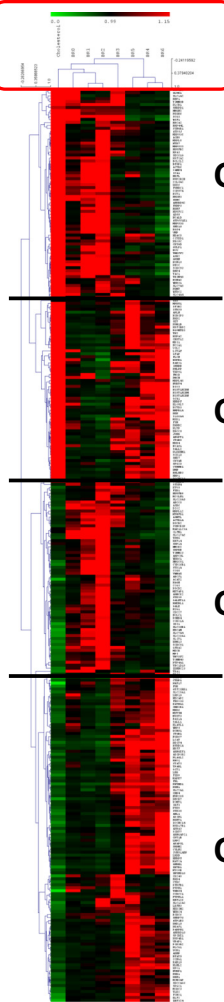**B**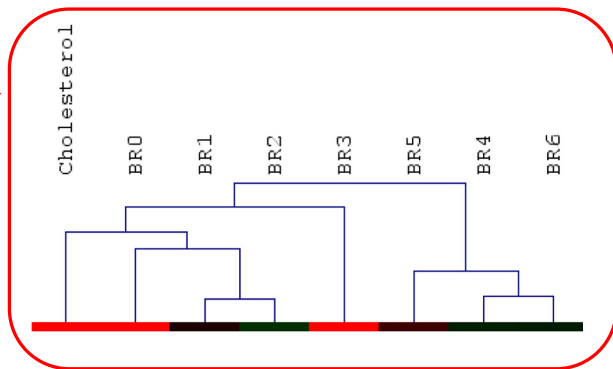

Supplement: MOESM7 [file 9644418]
